# Supplementary material
Source: PubMed Central journal article supplement (PMC2758143)
Supplement: ddp362_1.pdf [file ddp362_1.pdf]

## **Supplemental material**

Supplemental figure 1: (A) ClastW alignment of zebrafish, fugu, human and mouse Tcap peptide sequences. (B) Percentage of identities/similarities among zebrafish, fugu, human and mouse Tcap peptide sequences. (C) Phylogenetic analysis of zebrafish, fugu, human and mouse Tcap peptide sequences.

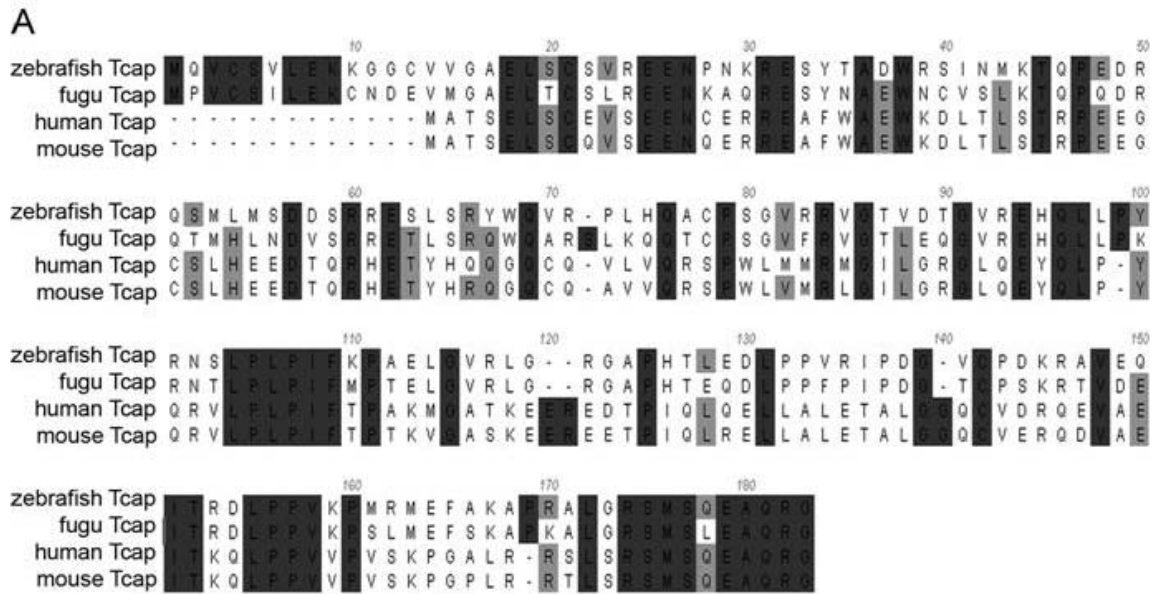

**B**

| Identities/Similarities | zebrafish | fugu  | human |
|-------------------------|-----------|-------|-------|
| fugu Tcap               | 65/76     |       |       |
| human Tcap              | 38/54     | 36/56 |       |
| mouse Tcap              | 39/57     | 38/59 | 82/88 |

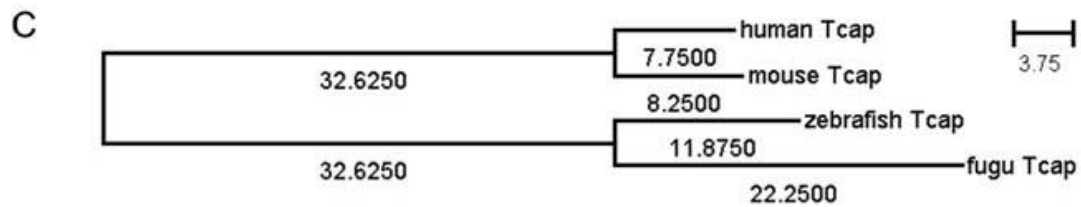

**Supplemental Fig. 1**

Supplemental figure 2: GFP expression profile of stable transgenic line Tg (Tcap: *egfp*) that contains a 2.5 kb promoter from *tcap*. Strong GFP expression is detected in skeletal muscles (B, D and F), but no expression or only weak expression are detected in the heart (A, C, and E) in both embryonic and adult stages.

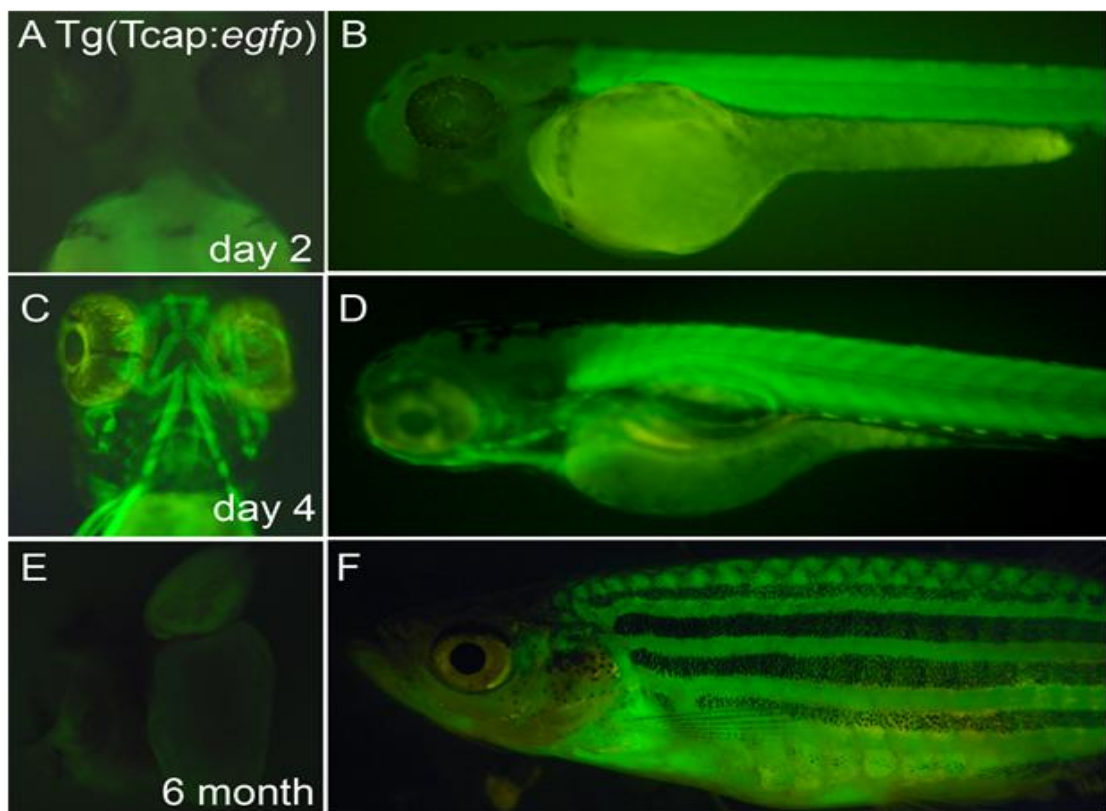

**Supplemental Fig. 2**

Supplemental figure 3: Myocyte differentiation is undisrupted in the *tcap* morphants. *MyoD* expression in myoblast progenitor cells of *tcap* morphants (C-F) has similar pattern as in wild-type fish (A-B) at 10 S as revealed by *in situ* hybridization. A, C, E, dorsal view, anterior to the top. B, D, F, lateral view, anterior to the left.

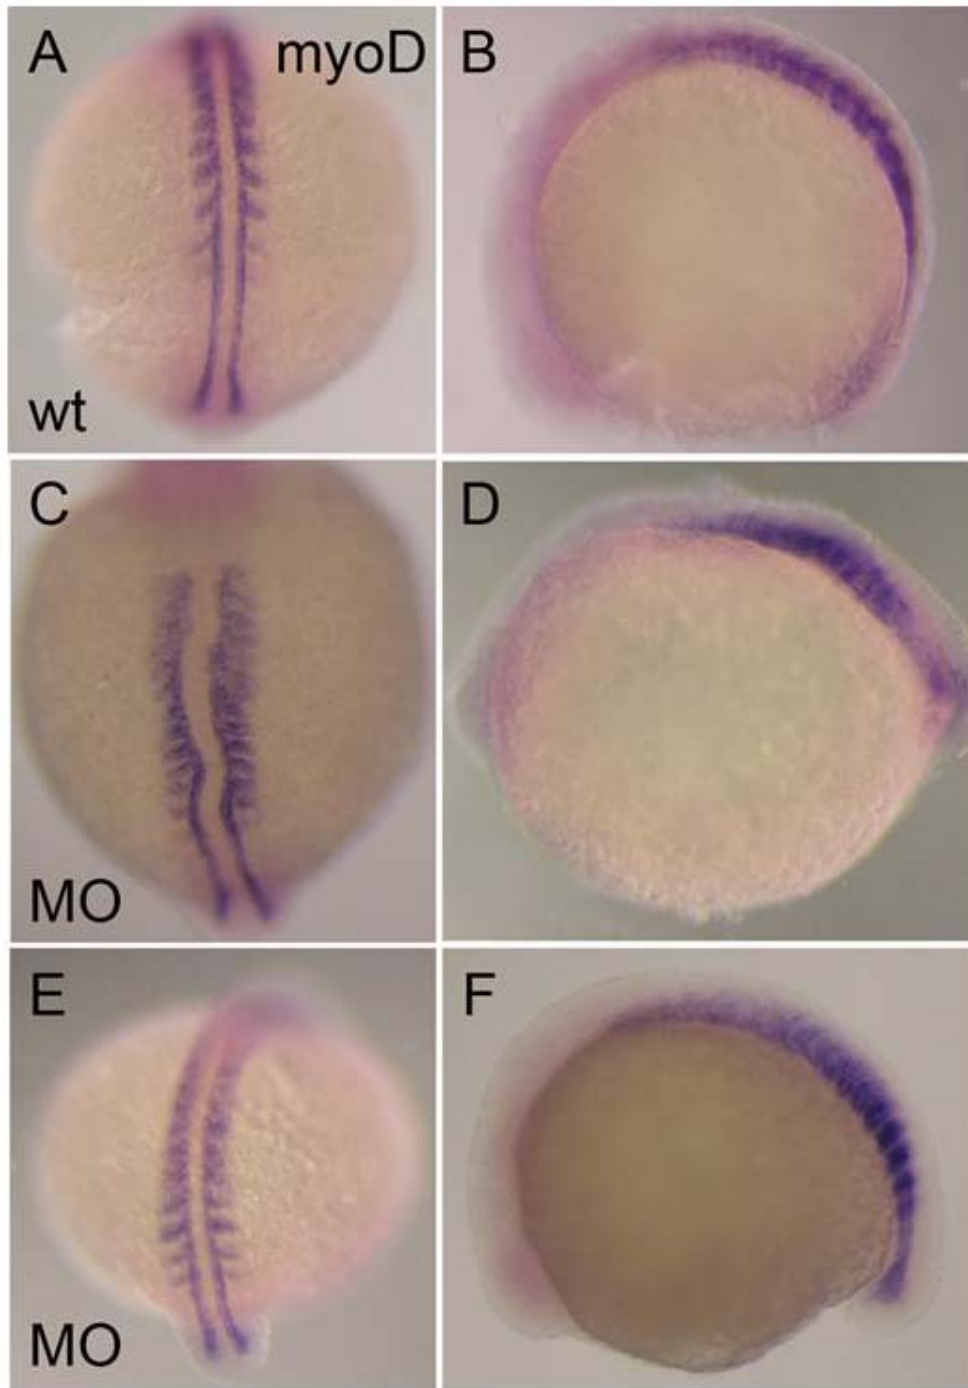

Supplemental Fig. 3

Supplemental table 1: Relative expression levels of the *tcap* transcript at different embryonic stages and in adult organs, as revealed by quantitative RT-PCR. The values are normalized to that at 24 hpf, which was defined as one.

| stage              | relative level |
|--------------------|----------------|
| 14S                | 0.33           |
| 18S                | 0.23           |
| 21S                | 1.1            |
| 24h                | 1.0            |
| 48h                | 25             |
| 72h                | 12             |
| 96h                | 71             |
| adult ventricle    | 6.0E5          |
| adult atrium       | 7.9E5          |
| adult quick muscle | 9.1E4          |

**Supplemental Table. 1**



Supplemental table 2: *tcap* morphants can be rescued by co-injection of *tcap* RNA. A graphic summary of these data are presented in Figure 3E.

|             | normal | weak  | severe | fish No. |
|-------------|--------|-------|--------|----------|
| MO (1 ng)   | 31.9%  | 25.6% | 42.5%  | 113      |
| RNA (30 pg) | 91.9%  | 1.1%  | 7.0%   | 186      |
| MO+RNA      | 90.0%  | 5.0%  | 5.0%   | 240      |
| MO (2 ng)   | 36.1%  | 11.3% | 52.6%  | 97       |
| RNA (60 pg) | 90.6%  | 0.0%  | 9.4%   | 223      |
| MO+RNA      | 77.3%  | 17.0% | 5.7%   | 88       |

**Supplemental Table.2**

Supplemental table 3: The percentage of cells with normal striations and cells with either weak or no stripes in different classes of *tcap* morphants. A graphic summary of these data are presented in Figure 6I.

|        | striped cell | weak or no stripe | total |
|--------|--------------|-------------------|-------|
| normal | 33           |                   | 33    |
| weak   | 38           | 1                 | 39    |
| severe | 25           | 9                 | 34    |

**Supplemental Table. 3**

Supplemental table 4: The percentage of cells with normal striations and cells with either weak or no stripes in control and anesthetized fish.

|            | striped<br>cell | weak or<br>no stripe | total |
|------------|-----------------|----------------------|-------|
| control    | 127             |                      | 127   |
| anesthesia | 73              | 38                   | 111   |

**Supplemental Table. 4**

Supplemental movie 1: Wild-type fish are sensitive to touch, while *tcap* morphants show a much slower response to touch and an abnormal swimming pattern.
